# Supplementary material
Source: publisher figshare collection journal article supplement (https://tandf.figshare.com/ndownloader/files/16918967)
Supplement: Supplementary file 1 [file 16918967]

**Table 1s. Joanna Briggs Institute Critical Appraisal Tool**

| JOANNA BRIGGS INSTITUTE CRITICAL APPRAISAL TOOL FOR CASE CONTROL STUDIES |                                                                                                                  |                                                                                                             |                                                                                                                  |                                                                    |                                                                  |                                                                                    |                                                                           |                                                                                         |                                                                                           |                                                |       |      |
|--------------------------------------------------------------------------|------------------------------------------------------------------------------------------------------------------|-------------------------------------------------------------------------------------------------------------|------------------------------------------------------------------------------------------------------------------|--------------------------------------------------------------------|------------------------------------------------------------------|------------------------------------------------------------------------------------|---------------------------------------------------------------------------|-----------------------------------------------------------------------------------------|-------------------------------------------------------------------------------------------|------------------------------------------------|-------|------|
| Yes = 2<br>Unclear = 1<br>No = 0<br>NA                                   |                                                                                                                  |                                                                                                             |                                                                                                                  |                                                                    |                                                                  |                                                                                    |                                                                           |                                                                                         |                                                                                           |                                                |       |      |
| Study                                                                    | 1. Were the groups comparable other than the presence of disease in cases or the absence of disease in controls? | 2. Were cases and controls matched appropriately?                                                           | 3. Were the same criteria used for identification of cases and controls?                                         | 4. Was exposure measured in a standard, valid and reliable way?    | 5. Was exposure measured in the same way for cases and controls? | 6. Were confounding factors identified?                                            | 7. Were strategies to deal with confounding factors stated?               | 8. Were outcomes assessed in a standard, valid and reliable way for cases and controls? | 9. Was the exposure period of interest long enough to be meaningful?                      | 10. Was appropriate statistical analysis used? | TOTAL | %    |
| Brown 2008                                                               | 0                                                                                                                | 2                                                                                                           | 1                                                                                                                | 1                                                                  | 2                                                                | 1                                                                                  | 0                                                                         | 2                                                                                       | 2                                                                                         | 1                                              | 12    | 60 % |
| Chen 2017                                                                | 2                                                                                                                | 2                                                                                                           | 2                                                                                                                | 2                                                                  | 2                                                                | 2                                                                                  | 2                                                                         | 2                                                                                       | 2                                                                                         | 2                                              | 20    | 100% |
| Cho 2015                                                                 | 2                                                                                                                | 2                                                                                                           | 2                                                                                                                | 2                                                                  | 2                                                                | 2                                                                                  | 2                                                                         | 2                                                                                       | 2                                                                                         | 2                                              | 20    | 100% |
| Cohen 2016                                                               | 2                                                                                                                | 2                                                                                                           | 2                                                                                                                | 2                                                                  | 2                                                                | 2                                                                                  | 2                                                                         | 2                                                                                       | 2                                                                                         | 2                                              | 20    | 100% |
| Kabbabe 2010                                                             | 2                                                                                                                | 2                                                                                                           | 1                                                                                                                | 2                                                                  | 2                                                                | 1                                                                                  | 1                                                                         | 2                                                                                       | 2                                                                                         | 1                                              | 16    | 80%  |
| Kilian 2007                                                              | 2                                                                                                                | 2                                                                                                           | 2                                                                                                                | 2                                                                  | 2                                                                | 0                                                                                  | 0                                                                         | 2                                                                                       | 2                                                                                         | 2                                              | 16    | 80%  |
| Ha 2014                                                                  | 2                                                                                                                | 2                                                                                                           | 2                                                                                                                | 2                                                                  | 2                                                                | 2                                                                                  | 2                                                                         | 2                                                                                       | 2                                                                                         | 2                                              | 20    | 100% |
| Kim 2010                                                                 | 2                                                                                                                | 1                                                                                                           | 1                                                                                                                | 1                                                                  | 1                                                                | 0                                                                                  | 0                                                                         | 2                                                                                       | 2                                                                                         | 2                                              | 12    | 60%  |
| Lho 2013                                                                 | 2                                                                                                                | 2                                                                                                           | 2                                                                                                                | 2                                                                  | 2                                                                | 2                                                                                  | 2                                                                         | 2                                                                                       | 2                                                                                         | 2                                              | 20    | 100% |
| Lubis 2013                                                               | 2                                                                                                                | 2                                                                                                           | 2                                                                                                                | 2                                                                  | 2                                                                | 2                                                                                  | 2                                                                         | 2                                                                                       | 2                                                                                         | 2                                              | 20    | 100% |
| Raykha 2014                                                              | 1                                                                                                                | 2                                                                                                           | 1                                                                                                                | 2                                                                  | 2                                                                | 0                                                                                  | 0                                                                         | 2                                                                                       | 2                                                                                         | 0                                              | 12    | 60%  |
| Xu 2012                                                                  | 2                                                                                                                | 2                                                                                                           | 2                                                                                                                | 2                                                                  | 2                                                                | 2                                                                                  | 2                                                                         | 2                                                                                       | 2                                                                                         | 2                                              | 20    | 100% |
| Xu 2016                                                                  | 2                                                                                                                | 2                                                                                                           | 2                                                                                                                | 2                                                                  | 2                                                                | 2                                                                                  | 2                                                                         | 2                                                                                       | 2                                                                                         | 2                                              | 20    | 100% |
| Cher 2018                                                                | 2                                                                                                                | 2                                                                                                           | 2                                                                                                                | 2                                                                  | 2                                                                | 2                                                                                  | 2                                                                         | 2                                                                                       | 2                                                                                         | 2                                              | 20    | 100% |
| JOANNA BRIGGS INSTITUTE CRITICAL APPRAISAL TOOL FOR CASE SERIES STUDIES  |                                                                                                                  |                                                                                                             |                                                                                                                  |                                                                    |                                                                  |                                                                                    |                                                                           |                                                                                         |                                                                                           |                                                |       |      |
| Yes = 2<br>Unclear = 1<br>No = 0<br>NA                                   |                                                                                                                  |                                                                                                             |                                                                                                                  |                                                                    |                                                                  |                                                                                    |                                                                           |                                                                                         |                                                                                           |                                                |       |      |
| Study                                                                    | 1. Were there clear criteria for inclusion in the case series?                                                   | 2. Was the condition measured in a standard, reliable way for all participants included in the case series? | 3. Were valid methods used for identification of the condition for all participants included in the case series? | 4. Did the case series have consecutive inclusion of participants? | 5. Did the case series have complete inclusion of participants?  | 6. Was there clear reporting of the demographics of the participants in the study? | 7. Was there clear reporting of clinical information of the participants? | 8. Were the outcomes or follow up results of cases clearly reported?                    | 9. Was there clear reporting of the presenting site(s)/clinic(s) demographic information? | 10. Was statistical analysis appropriate?      | TOTAL | %    |
| Uththoff 2007                                                            | 2                                                                                                                | 2                                                                                                           | 1                                                                                                                | 2                                                                  | 2                                                                | 2                                                                                  | 1                                                                         | 2                                                                                       | 2                                                                                         | 2                                              | 18    | 90%  |
